# Supplementary material for: Membrane translocation of t-SNARE protein syntaxin-4 abrogates ground-state pluripotency in mouse embryonic stem cells
Source: PubMed Central journal article supplement (PMC5216394; doi:10.1038/srep39868), 2017-01-06
Supplement: srep39868-s1.pdf [file srep39868-s1.pdf]

## **Supplementary information for:**

Membrane translocation of t-SNARE protein syntaxin-4 abrogates ground-state pluripotency in mouse embryonic stem cells

by

Natsumi Hagiwara-Chatani<sup>1</sup>, Kota Shirai<sup>1</sup>, Takumi Kido<sup>1</sup>, Tomoatsu Horigome<sup>1</sup>, Akihiro Yasue<sup>2</sup>, Naoki Adachi<sup>1</sup>, Yohei Hirai<sup>1\*</sup>

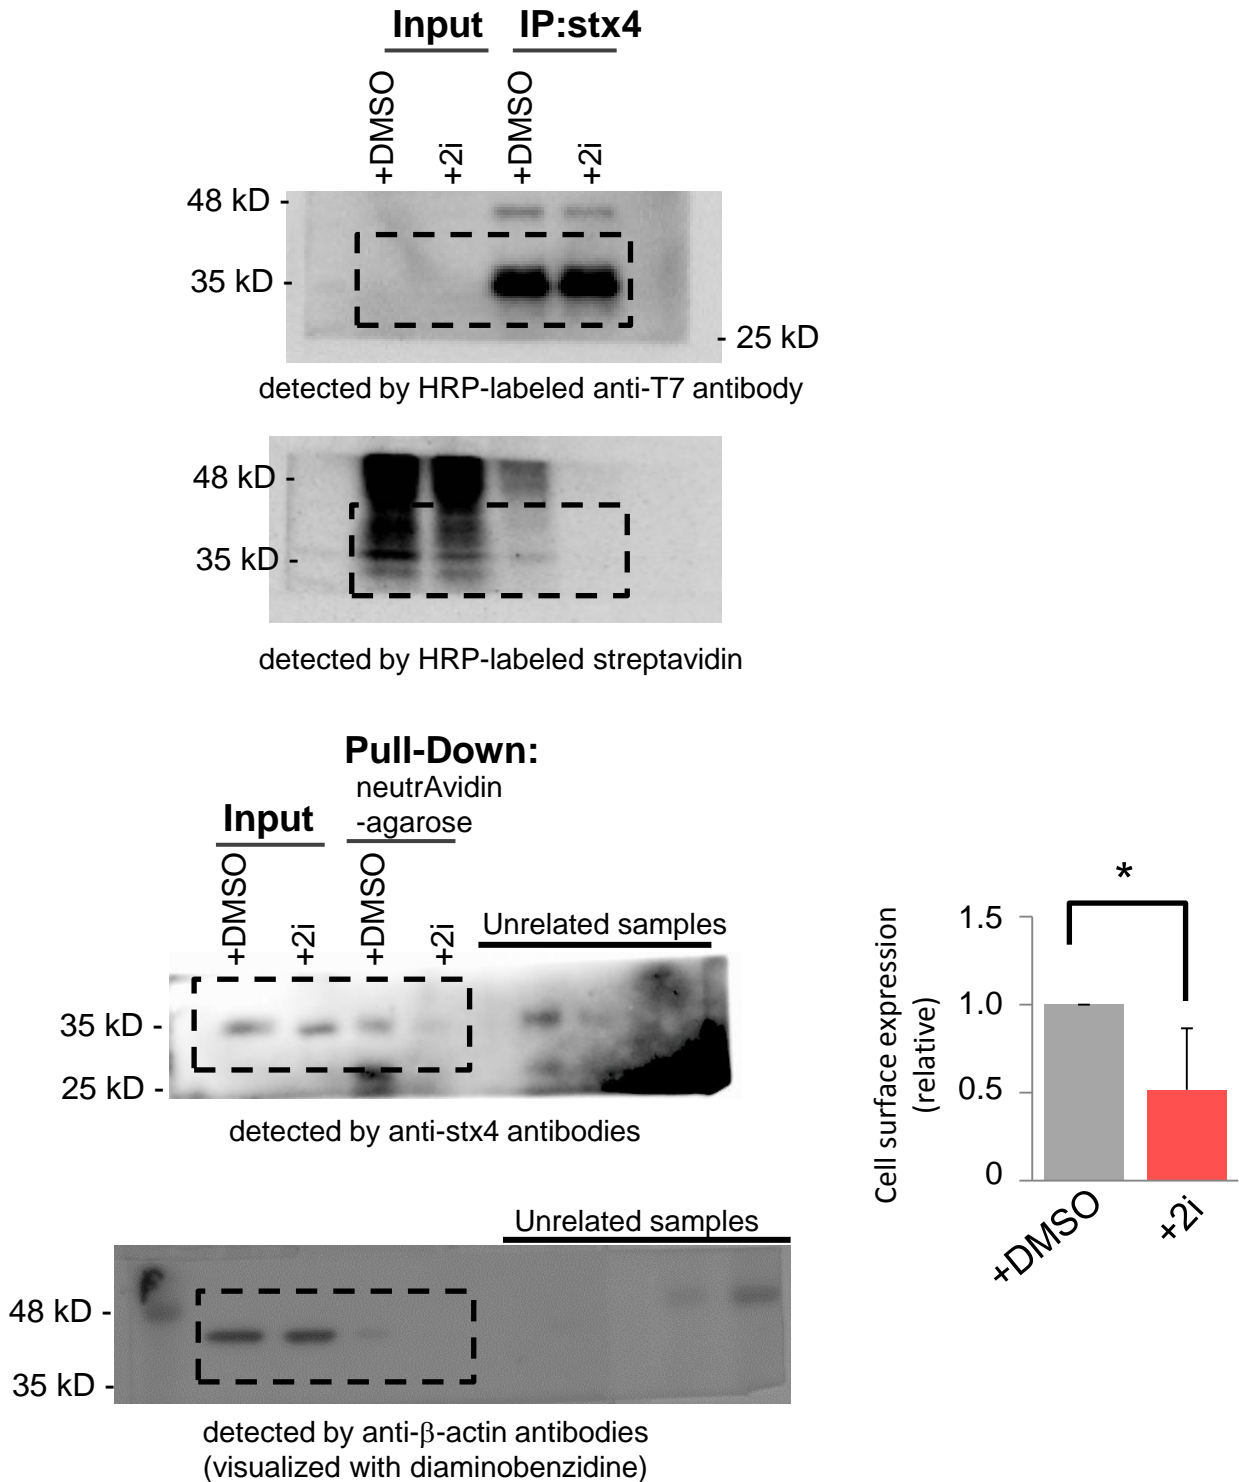

Original blot images of Fig. 1B (without image manipulation). Appropriate areas of the PVDF membrane, onto which protein bands had been transferred, were cut out and the target protein was detected. Dotted areas were cropped, processed within the guidelines, and used for the figure. Lower right, quantification of cell surface extrusion of endogenous syntaxin-4 from three independent experiments are shown. \* $p < 0.05$ .

# Supplementary Fig. S1 (2/6)

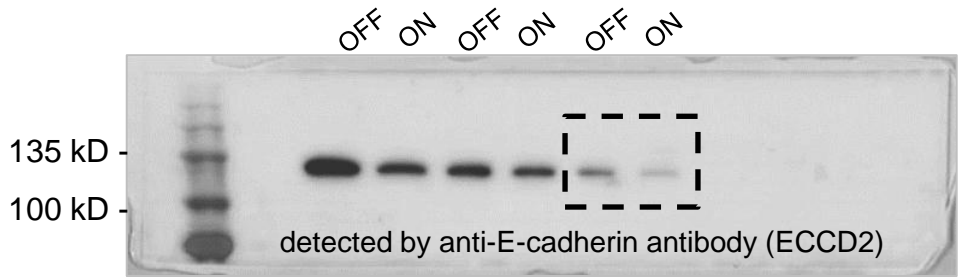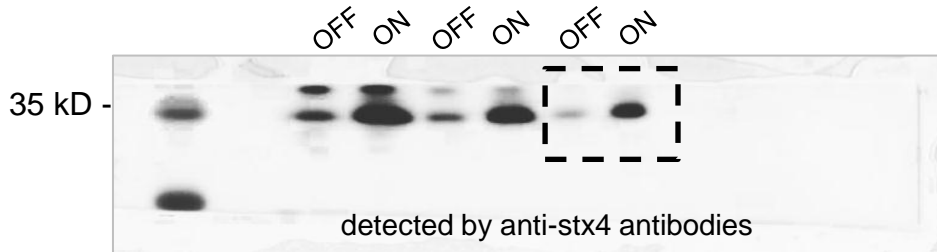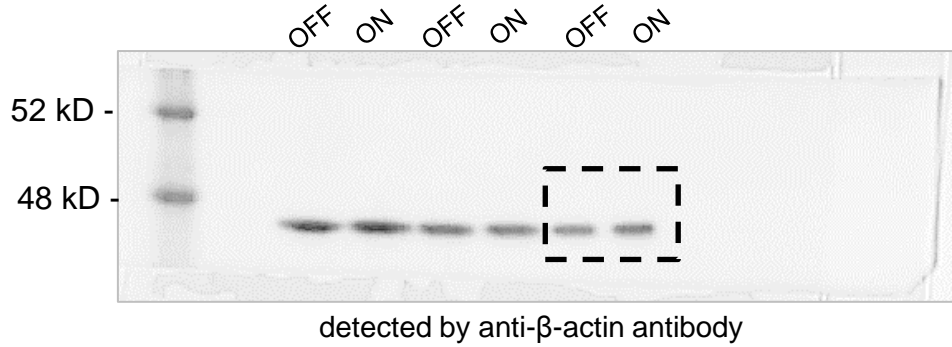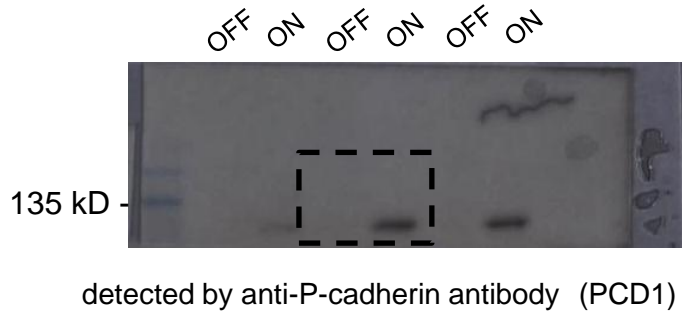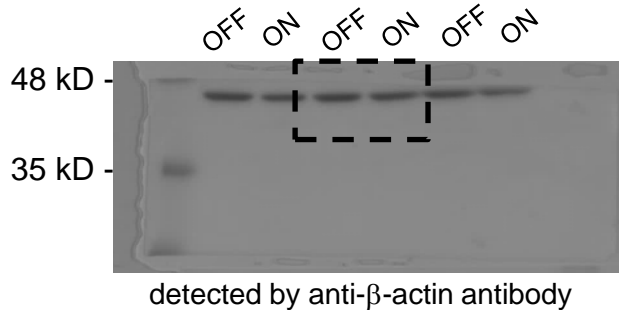

Original blot images of Fig. 2D (without image manipulation). Appropriate areas of the PVDF membrane, onto which protein bands had been transferred, were cut out and the target protein was detected. Dotted areas were cropped, processed within the guidelines, and used for the figure.

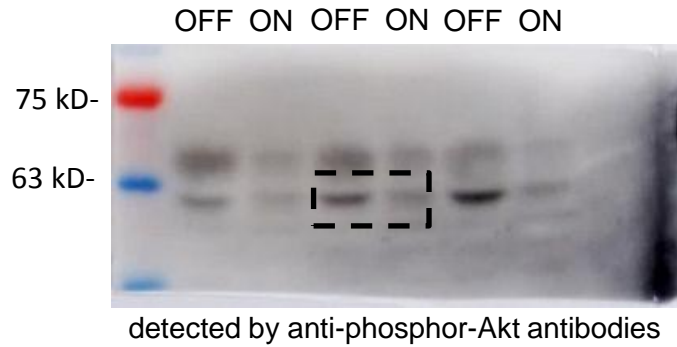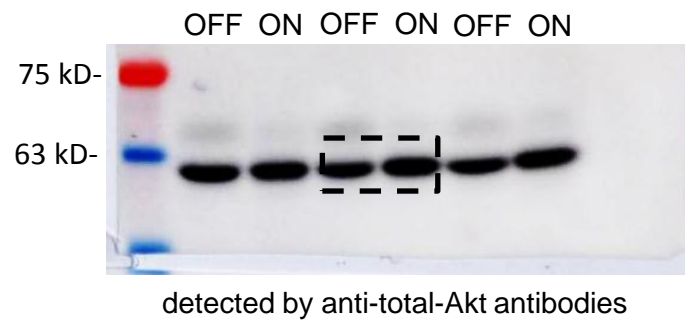

Original blot images of Fig. 3E (without image manipulation). Appropriate areas of the PVDF membrane, onto which protein bands had been transferred, were cut out and the target protein was detected. Dotted areas were cropped, processed within the guidelines, and used for the figure.

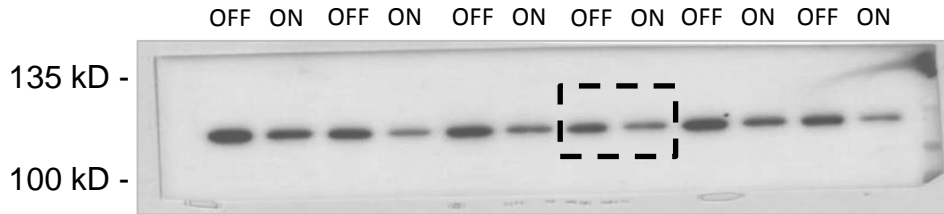

detected by anti-E-cadherin antibody (ECCD2)

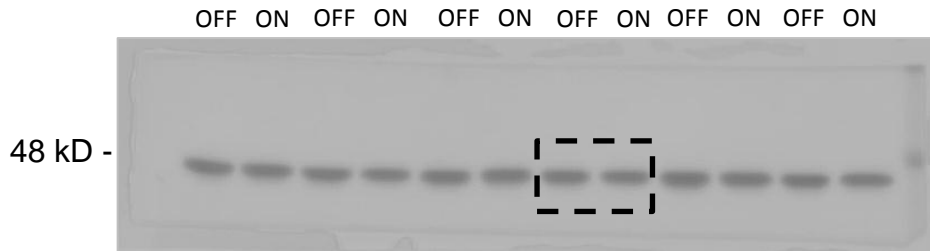

detected by anti- $\beta$ -actin antibody

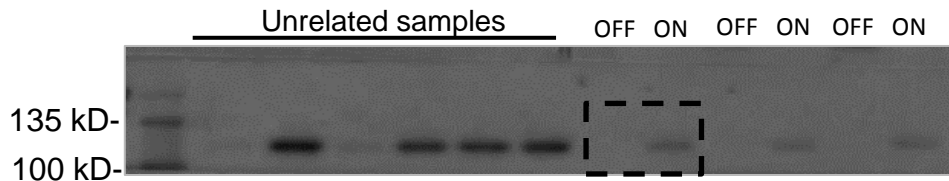

detected by anti-P-cadherin antibody (PCD1)

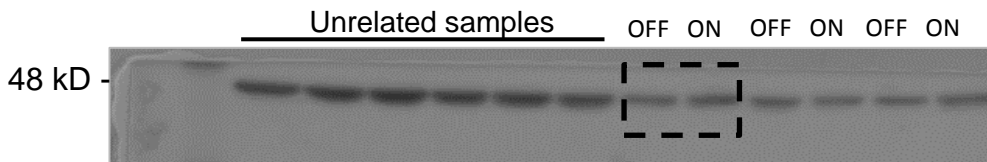

detected by anti- $\beta$ -actin antibody

Original blot images of Fig. 5D (without image manipulation). Appropriate areas of the PVDF membrane, onto which protein bands had been transferred, were cut out and the target protein was detected. Dotted areas were cropped, processed within the guidelines, and used for the figure.

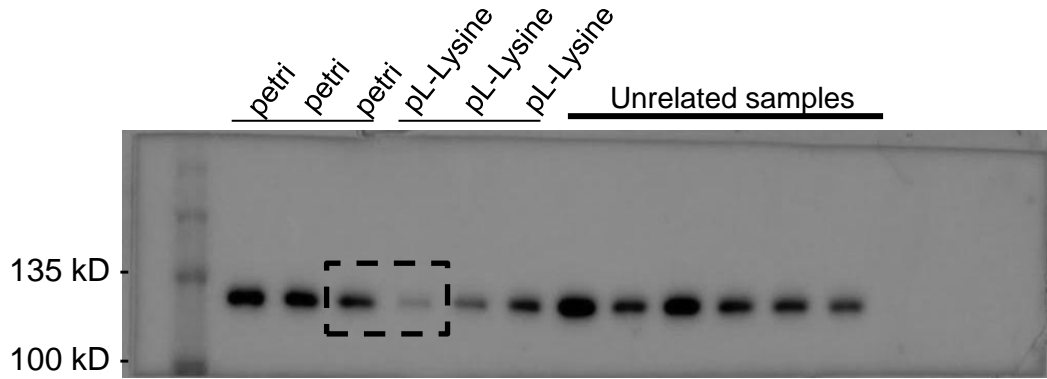

detected by anti-E-cadherin antibody (ECDD2)

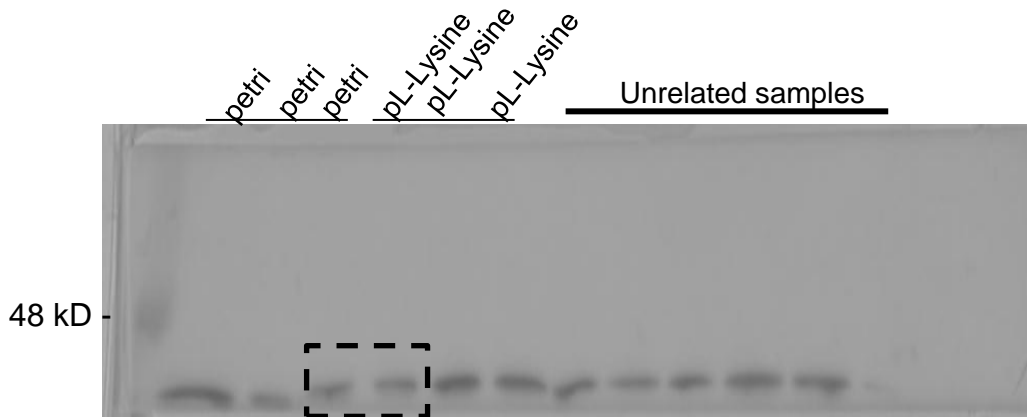

detected by anti- $\beta$ -actin antibody

Original blot images of Fig. 6B (without image manipulation). Appropriate areas of the PVDF membrane, onto which protein bands had been transferred, were cut out and the target protein was detected. Dotted areas were cropped, processed within the guidelines, and used for the figure.

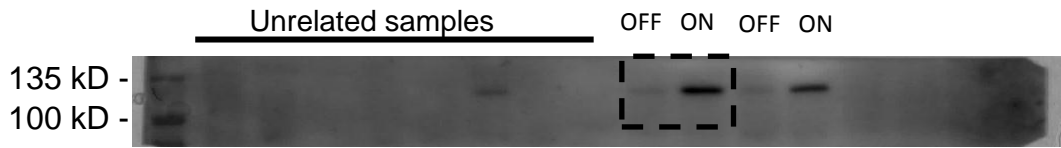

detected by anti-P-cadherin antibody (PCD1)

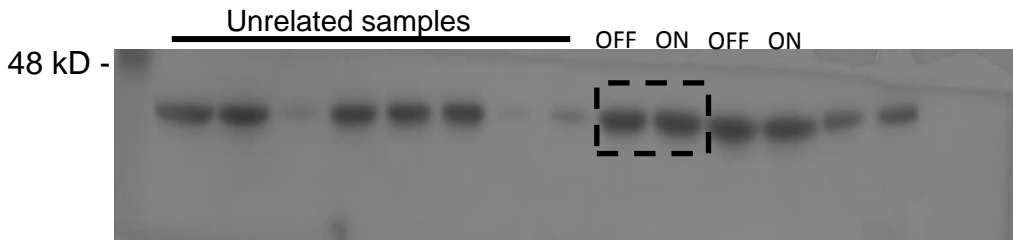

detected by anti- $\beta$ -actin antibody

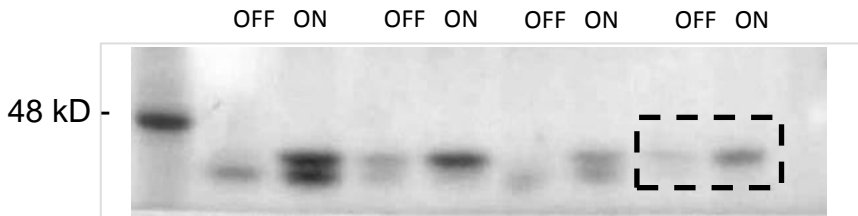

detected by anti- $\alpha$ SMA antibody

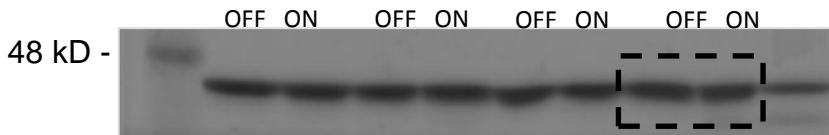

detected by anti- $\beta$ -actin antibody

Original blot images of Fig. 7C (upper) and 7D (lower) (without image manipulation). Appropriate areas of the PVDF membrane, onto which protein bands had been transferred, were cut out and the target protein was detected. Dotted areas were cropped, processed within the guidelines, and used for the figure.

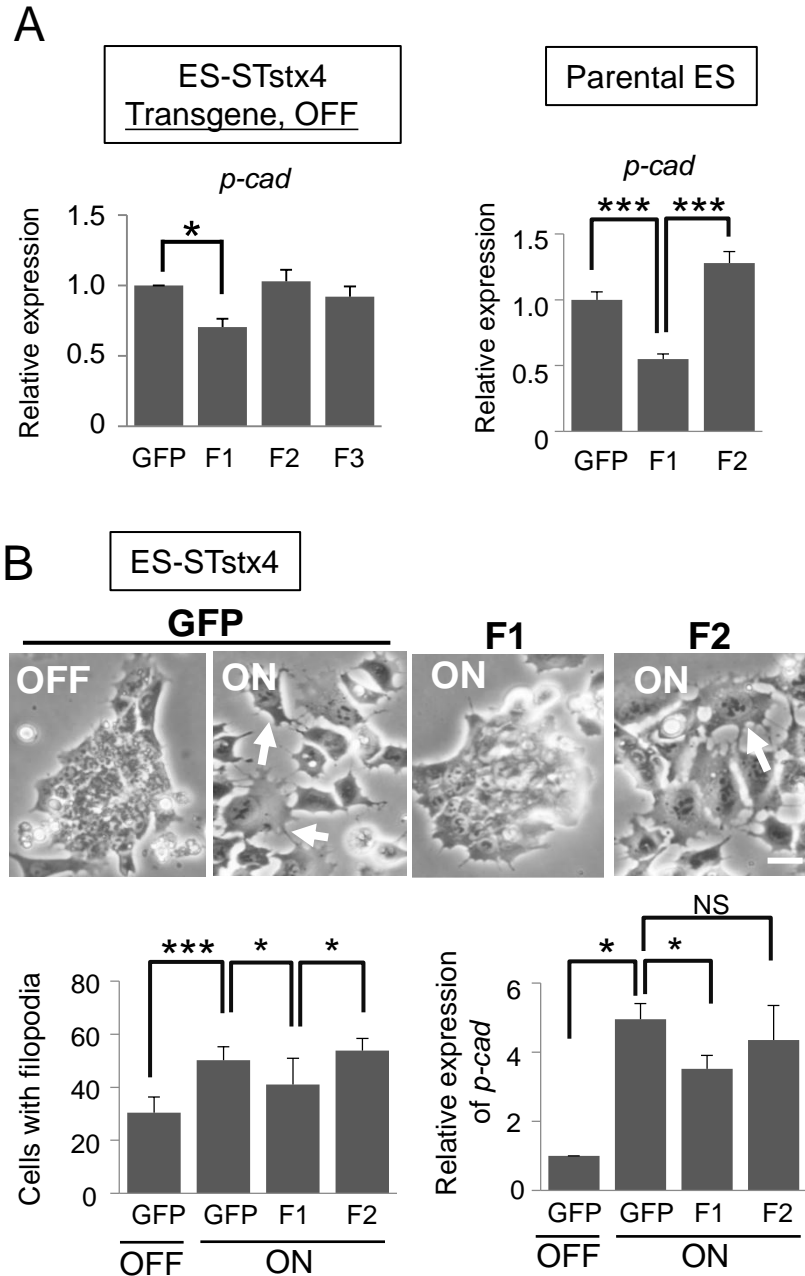

**The antagonistic effect of syntaxin-4 fragments** (A), Left, *p-cadherin* expression in ES-STstx4 cells without transgene expression. Cells were incubated with one of syntaxin-4 fragments or GFP control for three days. Recombinant F1 shows clear antagonistic effect, which is also the case in parental ES cells (right).  $N = 3$ .  $*p < 0.05$ ,  $***p < 0.001$ . (B), Upper images, phase-contrast images of ES-STstx4 cells (transgene, ON) incubated with recombinant F1, F2, or GFP control. Bar, 20  $\mu\text{m}$ . Lower panels, quantification of cells with active filopodia (left;  $N = 6$ ) and relative expression of *p-cadherin* (right,  $N = 4$ ).  $*p < 0.05$ ,  $**p < 0.01$ ,  $***p < 0.001$ . Cell surface expression of syntaxin-4 (ON) leads to morphological changes and upregulation of *p-cadherin*, both of which are blocked by the syntaxin-4 fragment F1.



## Supplementary Table. S1 (1/3)

Up-regulated  
(42 Genes)

| P-value    | Q-value    | logFC       | Gene_Sym      | Gene_ID     |
|------------|------------|-------------|---------------|-------------|
| 2.68E-25   | 2.71E-22   | 6.441901436 | Pvalb         | XLOC_007203 |
| 1.67E-08   | 0.00000148 | 6.378982017 | Neb1          | XLOC_011635 |
| 1.55E-07   | 0.00000991 | 5.757701258 | Frrs11        | XLOC_014504 |
| 0.0000997  | 0.00234889 | 4.91686417  | Wfdc1         | XLOC_020241 |
| 0.00020709 | 0.00425449 | 4.784127639 | Spink2        | XLOC_015948 |
| 0.00036427 | 0.00651313 | 4.783773456 | Rims1         | XLOC_000682 |
| 0.00043172 | 0.00741562 | 4.637929669 | 4933422H20Rik | XLOC_003133 |
| 2.46E-08   | 0.00000207 | 4.356547654 | Fut1          | XLOC_018045 |
| 0.0000185  | 0.00057796 | 3.729680477 | Edn3          | XLOC_011535 |
| 0.00035223 | 0.00636155 | 3.727069834 | Tsga10        | XLOC_000722 |
| 8.85E-07   | 0.0000447  | 3.461856888 | Duoxa1        | XLOC_012226 |
| 4.09E-30   | 8.3E-27    | 3.454956441 | T             | XLOC_008204 |
| 0.00050787 | 0.0083368  | 3.271532311 | 5730405O15Rik | XLOC_022189 |
| 2.62E-09   | 2.73E-07   | 3.020340997 | Col4a5        | XLOC_022552 |
| 2.24E-08   | 0.00000192 | 2.819239058 | Gad1          | XLOC_010906 |
| 0.0000963  | 0.00227932 | 2.814505944 | Gm3414        | XLOC_015880 |
| 1.51E-47   | 1.75E-43   | 2.743397167 | Stx4a         | XLOC_018464 |
| 4.93E-35   | 1.64E-31   | 2.710025626 | Shf           | XLOC_012227 |
| 4.08E-17   | 1.5E-14    | 2.68816501  | Frem2         | XLOC_013206 |
| 0.00010698 | 0.00248674 | 2.651385185 | Fer114        | XLOC_012397 |
| 3.07E-07   | 0.0000178  | 2.633984759 | Cxx1c         | XLOC_022295 |
| 0.00000112 | 0.0000548  | 2.631951397 | Cdx1          | XLOC_009752 |
| 0.000017   | 0.00053887 | 2.577476868 | Gm16023       | XLOC_015025 |
| 0.00023762 | 0.00470864 | 2.576832407 | Hmcn1         | XLOC_001055 |
| 1.76E-08   | 0.00000155 | 2.571844654 | Pcdh7         | XLOC_015247 |
| 5.69E-10   | 6.99E-08   | 2.502587699 | Thsd4         | XLOC_021823 |
| 4.28E-22   | 2.93E-19   | 2.43136854  | St3gal1       | XLOC_007118 |
| 2.67E-17   | 1.02E-14   | 2.334411538 | Madcam1       | XLOC_001545 |
| 0.00000353 | 0.00014362 | 2.325212618 | 4930556M19Rik | XLOC_006631 |
| 2.17E-17   | 8.55E-15   | 2.325148438 | Sp5           | XLOC_010904 |
| 0.0000836  | 0.00201733 | 2.291380548 | Fgf8          | XLOC_010538 |
| 0.00000403 | 0.0001606  | 2.257592134 | Col4a6        | XLOC_023056 |
| 6.11E-11   | 9.36E-09   | 2.233708625 | Cxcl12        | XLOC_016819 |
| 0.0000002  | 0.0000123  | 2.200744747 | Tnc           | XLOC_014555 |
| 4.71E-21   | 2.96E-18   | 2.159019052 | Chac1         | XLOC_011169 |
| 0.00000169 | 0.000077   | 2.123771292 | Plekhh3       | XLOC_003878 |
| 0.0000283  | 0.00083244 | 2.077028614 | Rcor1         | XLOC_004479 |
| 5.71E-23   | 4.57E-20   | 2.070049006 | Pck2          | XLOC_005979 |
| 0.000026   | 0.00077332 | 2.066478069 | Sat2          | XLOC_002687 |
| 0.00040337 | 0.00701793 | 2.063773572 | Arhgap5       | XLOC_004192 |
| 4.08E-52   | 9.47E-48   | 2.049901227 | Cdh3          | XLOC_020182 |
| 0.00000134 | 0.0000641  | 2.041189264 | Bpifb5        | XLOC_011387 |

## Supplementary Table. S1 (2/3)

Down-  
regulated  
(96 Genes)

| P-value    | Q-value    | logFC        | Gene_Sym      | Gene_ID     |
|------------|------------|--------------|---------------|-------------|
| 0.0000162  | 0.00051574 | -2.045192342 | Ces2e         | XLOC_020145 |
| 0.00046709 | 0.00783342 | -2.060269848 | Cox7b2        | XLOC_015920 |
| 1.5E-11    | 2.74E-09   | -2.06093586  | Slc13a5       | XLOC_003575 |
| 0.00063112 | 0.0099254  | -2.069395521 | Tmprss11d     | XLOC_015960 |
| 3.16E-12   | 6.63E-10   | -2.070620985 | Spink3        | XLOC_009712 |
| 6.99E-15   | 1.98E-12   | -2.11919187  | Gpnmb         | XLOC_016567 |
| 4.15E-09   | 4.19E-07   | -2.121817674 | Tmem92        | XLOC_003748 |
| 0.00042281 | 0.00729261 | -2.132696181 | Mst1          | XLOC_021379 |
| 0.00000543 | 0.00020529 | -2.189481543 | Gm12794       | XLOC_013928 |
| 0.00021672 | 0.0044077  | -2.192903602 | Grin2a        | XLOC_007817 |
| 1.33E-09   | 0.00000015 | -2.20954754  | Vdr           | XLOC_007348 |
| 1.96E-17   | 7.97E-15   | -2.21703053  | Cyp1a1        | XLOC_021140 |
| 0.0000034  | 0.00013917 | -2.232918512 | Ccr4          | XLOC_022068 |
| 5.27E-23   | 4.37E-20   | -2.235700067 | Gpa33         | XLOC_000496 |
| 0.00000228 | 0.00010019 | -2.245182553 | Mapk10        | XLOC_016033 |
| 8.65E-07   | 0.0000438  | -2.254647813 | Spesp1        | XLOC_021833 |
| 3.16E-16   | 1.01E-13   | -2.295469837 | Fbp2          | XLOC_005567 |
| 4.78E-08   | 0.00000355 | -2.348389077 | Gm2016        | XLOC_004340 |
| 0.0000469  | 0.00125862 | -2.36029789  | Ctrl          | XLOC_020697 |
| 0.0000693  | 0.00174267 | -2.360350273 | Hist3h2a      | XLOC_002598 |
| 0.00019785 | 0.00412442 | -2.366275168 | Cml2          | XLOC_017295 |
| 0.0000105  | 0.00036549 | -2.391585229 | Gm11544       | XLOC_003749 |
| 0.0000063  | 0.00023315 | -2.400233761 | Zscan4e       | XLOC_018693 |
| 6.78E-09   | 6.38E-07   | -2.405978803 | D030018L15Rik | XLOC_007336 |
| 0.000024   | 0.00072132 | -2.412144203 | Wdr20b        | XLOC_004221 |
| 4.28E-30   | 8.3E-27    | -2.415227709 | Gm7102        | XLOC_010593 |
| 0.00048738 | 0.00810348 | -2.427818194 | Krt5          | XLOC_007415 |
| 0.00053241 | 0.00862386 | -2.456332486 | Nckap5        | XLOC_000972 |
| 0.0005324  | 0.00862386 | -2.456335165 | Krt15         | XLOC_003852 |
| 0.00053235 | 0.00862386 | -2.456349832 | AI847159      | XLOC_012262 |
| 1.08E-13   | 2.68E-11   | -2.495241359 | Usp17le       | XLOC_019383 |
| 0.00000854 | 0.00030421 | -2.510470321 | Ndnf          | XLOC_016631 |
| 0.0000173  | 0.00054724 | -2.511268196 | Spink10       | XLOC_009523 |
| 0.00029671 | 0.00558443 | -2.532795091 | Csf1r         | XLOC_009515 |
| 0.0004492  | 0.00765491 | -2.533664955 | Dnajb13       | XLOC_019296 |
| 1.07E-16   | 3.64E-14   | -2.542263112 | Gm8300        | XLOC_004335 |
| 2.3E-32    | 5.93E-29   | -2.566794203 | Dusp27        | XLOC_001128 |
| 8.02E-12   | 1.55E-09   | -2.601310778 | Usp17la       | XLOC_018303 |
| 0.00050022 | 0.00825203 | -2.605538775 | Cyp11a1       | XLOC_021144 |
| 0.0000909  | 0.00217432 | -2.674528102 | Tm4sf1        | XLOC_013213 |
| 8.94E-27   | 1.09E-23   | -2.720357356 | Gm2022        | XLOC_004341 |
| 0.0000391  | 0.00108262 | -2.755101271 | Gm5622        | XLOC_005944 |
| 0.00000032 | 0.0000184  | -2.770381603 | Prmt8         | XLOC_017485 |
| 7.05E-20   | 4E-17      | -2.779433838 | 1700030L20Rik | XLOC_013600 |
| 6.19E-14   | 1.6E-11    | -2.781311721 | Gm5039        | XLOC_004760 |
| 0.00061814 | 0.00976089 | -2.795392758 | Cd96          | XLOC_008017 |
| 0.00008    | 0.00194813 | -2.805727893 | Tesc          | XLOC_015487 |
| 0.0002569  | 0.0050042  | -2.80923818  | Xirp2         | XLOC_010888 |

## Supplementary Table. S1 (3/3)

| P-value    | Q-value    | logFC        | Gene_Sym      | Gene_ID     |
|------------|------------|--------------|---------------|-------------|
| 8.75E-08   | 0.00000603 | -2.847680419 | Gm1995        | XLOC_004339 |
| 0.0000229  | 0.00069536 | -2.863481368 | Ctxn3         | XLOC_009496 |
| 2.12E-36   | 8.21E-33   | -2.873074653 | Dcdc2c        | XLOC_004573 |
| 0.00021871 | 0.0044399  | -2.88228013  | BB287469      | XLOC_004337 |
| 0.00032465 | 0.0060176  | -2.912221171 | AI662270      | XLOC_002863 |
| 7.46E-14   | 1.88E-11   | -2.920541889 | Gm4971        | XLOC_019176 |
| 1.24E-17   | 5.34E-15   | -2.965025919 | Zscan4a       | XLOC_018690 |
| 0.00000442 | 0.00017278 | -2.977802365 | Gm13119       | XLOC_014241 |
| 3.11E-23   | 2.78E-20   | -2.984901882 | D17Ertd648e   | XLOC_008774 |
| 6.06E-10   | 7.41E-08   | -3.104147993 | Gm2027        | XLOC_004182 |
| 3.9E-46    | 3.02E-42   | -3.122619226 | Gm20767       | XLOC_005282 |
| 0.00000552 | 0.00020807 | -3.135977495 | Gm13128       | XLOC_014240 |
| 2.27E-08   | 0.00000193 | -3.144462691 | Fam159b       | XLOC_005717 |
| 3.07E-26   | 3.57E-23   | -3.176211149 | Zscan4c       | XLOC_017668 |
| 2.56E-07   | 0.0000152  | -3.215734392 | Tdpoz4        | XLOC_012842 |
| 7.82E-28   | 1.3E-24    | -3.228172572 | AF067061      | XLOC_005283 |
| 4.38E-19   | 2.19E-16   | -3.230645622 | Gm5662        | XLOC_004758 |
| 3.09E-19   | 1.59E-16   | -3.252258567 | B020031M17Rik | XLOC_005755 |
| 0.00063188 | 0.00993056 | -3.292229707 | Trim43a       | XLOC_021282 |
| 2.36E-19   | 1.25E-16   | -3.342710106 | Zscan4f       | XLOC_017669 |
| 0.00023327 | 0.00464629 | -3.396578899 | Pramel6       | XLOC_011007 |
| 1.85E-08   | 0.00000161 | -3.401444404 | Usp17lc       | XLOC_018272 |
| 2.89E-34   | 8.39E-31   | -3.412070659 | Gm8994        | XLOC_016945 |
| 0.00000136 | 0.0000649  | -3.42872639  | Cdhr2         | XLOC_005090 |
| 2.94E-18   | 1.31E-15   | -3.451114743 | Zscan4d       | XLOC_018692 |
| 0.00000802 | 0.00028902 | -3.480606389 | Cyp26b1       | XLOC_017281 |
| 0.00011942 | 0.0027295  | -3.493623914 | Gm13109       | XLOC_014944 |
| 0.0000611  | 0.00156284 | -3.584555422 | Usp17ld       | XLOC_019337 |
| 0.0000312  | 0.0009057  | -3.67007993  | Ube2dnl1      | XLOC_022491 |
| 1.56E-14   | 4.2E-12    | -3.680689609 | Tcstv3        | XLOC_005285 |
| 2.99E-12   | 6.32E-10   | -3.75088191  | Cyp2b23       | XLOC_018879 |
| 1.44E-07   | 0.00000926 | -3.782138646 | BC147527      | XLOC_005284 |
| 2.18E-09   | 2.32E-07   | -3.908072628 | Gm4858        | XLOC_012832 |
| 9.1E-08    | 0.00000624 | -4.030260041 | 9330159F19Rik | XLOC_001362 |
| 0.0000167  | 0.0005305  | -4.030877571 | AF067063      | XLOC_005753 |
| 0.00000107 | 0.0000524  | -4.034966212 | Iqub          | XLOC_017044 |
| 1.81E-08   | 0.00000159 | -4.377729415 | Edn2          | XLOC_014042 |
| 4.43E-19   | 2.19E-16   | -4.723561445 | Usp17lb       | XLOC_019384 |
| 0.00048896 | 0.00812396 | -4.792300963 | Dpep3         | XLOC_020701 |
| 0.00018905 | 0.00397638 | -4.796045477 | BC080695      | XLOC_014232 |
| 0.00018903 | 0.00397638 | -4.796063808 | A430089119Rik | XLOC_016009 |
| 0.0000903  | 0.00216313 | -4.928822088 | Zscan4b       | XLOC_018691 |
| 0.00041638 | 0.00720649 | -4.937617042 | Gm13078       | XLOC_014234 |
| 0.00023877 | 0.00472746 | -5.042242675 | Trim75        | XLOC_020503 |
| 0.0000347  | 0.00098271 | -5.16086524  | Tdpoz3        | XLOC_012843 |
| 0.0000208  | 0.000639   | -5.16254066  | Gm6890        | XLOC_022378 |
| 0.0000111  | 0.00037847 | -5.361193588 | AU015228      | XLOC_011247 |
| 0.00000483 | 0.00018667 | -5.36358869  | Gm21319       | XLOC_004755 |

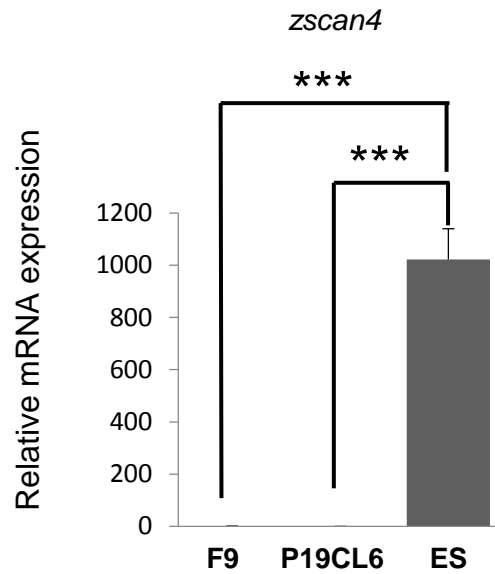

Expression of *zscan4* (*zscan4a*, *b*, *c*, *d* and *f*) in F9, P19CL6 and ES cells was analyzed by qRT-PCR. Primar pairs used are listed in Supplementary Table S2. N = 4, \*\*\*  $p < 0.001$ .

**Primer pairs used for qRT-PCR analyses**

| Target         | Forward                    | Reverse                  |
|----------------|----------------------------|--------------------------|
| E-cadherin     | GCTCTCATCATCGCCACAG        | GATGGGAGCGTTGTCATTG      |
| P-cadherin     | GCACTGCTGACCCTTCTACTG      | GGGCTCTTTGACCTTCCTCT     |
| Brachyury      | CCACAAAGATGTAATGGAGGAAC    | GAACAAGCCACCCCCATT       |
| $\alpha$ SMA   | CTCTCTTCCAGCCATCTTTCAT     | TATAGGTGGTTTCGTGGATGC    |
| MHC            | GAAGGAGGAGGAGCTTCAGG       | TCCTTGAAGCCTTTTCAGACTC   |
| BMP4           | GAGGAGTTTCCATCACGAAGA      | GCTCTGCCGAGGAGATCA       |
| Tuj1           | CCCACTCCATGTGAGTCCA        | GCAACATAAATACAGAGGTGGCTA |
| Nanog          | TTCTTGCTTACAAGGGTCTGC      | CAGGGCTGCCTTGAAGAG       |
| Oct3/4         | GTTGGAGAAGGTGGAACCAA       | CTCCTTCTGCAGGGCTTTC      |
| Slug           | CATTGCCTTGTGTCTGCAAG       | AGAAAGGCTTTTCCCCAGTG     |
| Snail          | CTTGTGTCTGCACGACCTGT       | CAGGAGAATGGCTTCTCACC     |
| Foxc2          | GCAACCCAACAGCAAACCTTTC     | GACGGCGTAGCTCGATAGG      |
| Vimentin       | TGCGCCAGCAGTATGAAA         | GCCTCAGAGAGGTCAGCAAA     |
| Cofilin        | TCCTTCTTCTCGTCCCAGTG       | TCATTCACTGTAACCTCAGATGC  |
| Zscan4         | GACTGAACTATCTAACATCCTCAGCA | TTGCAACATTCTTCTCTCTTTGA  |
| Gata4          | GGAAGACACCCCAATCTCG        | CATGGCCCCACAATTGAC       |
| AFP            | TGGATGTCAGGACAATCTGG       | GCAGCTTTGCTTGGACAGT      |
| Zeb1           | ACCCCTTCAAGAACCGCTTT       | CAATTGGCCACCACTGCTAA     |
| Gapdh          | TGACCACAGTCCATGCCATC       | GACGGACACATTGGGGGTAG     |
| $\beta$ -actin | CCTCACCTCCCAAAGC           | GTGGACTIONCAGGGCATGGA    |

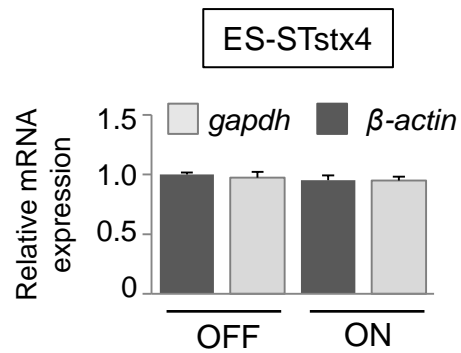

Relative expression of  $gapdh$  (□) and  $\beta$ -actin (■) in ES-STstx4 cells with (ON) and without (OFF) induction of cell surface syntaxin-4. Primer pairs used for the qRT-PCR analysis are listed in Supplementary Table. S2. N = 4

**siRNAs used for gene-silencing of Zscan4.**siRNA Zscan4#1

5' guagcgauaugaggagauudTdT 3'  
 3' dTdTcaucgcuauacuccucuaa 5'

siRNA Zscan4#2

5' gaccaacaauuuagaguudTdT 3'  
 3' dTdTcugguuguuaaaucucuaa 5'

siRNA Zscan4#3

5' caccaagugcucagcuaaadTdT  
 3' dTdTgugguucacgagucgauuu 5'

siRNA Zscan4#4

5' gcugcaaagucucuggaagdTdT 3'  
 3' dTdTcgacguuucagagaccuuc 5'

Control siRNA

Hilyte 488 –labeled NEGS/NEGAS  
 (universal negative control)

**Target sequences of the siRNAs.**

| Name of siRNA  | Target position on cDNA (bp) | Target Sequences    |
|----------------|------------------------------|---------------------|
| siRNA Zscan4#1 | 514-532 (exon II)            | gtagcgatatgaggagatt |
| siRNA Zscan4#2 | 236-254 (exon II)            | gaccaacaatttagagttt |
| siRNA Zscan4#3 | 304-322 (exon II)            | caccaagtgctcagctaaa |
| siRNA Zscan4#4 | 362-380 (exon II)            | gctgcaaagtctctggaag |
